# Supplementary material
Source: MDPI journal article supplement (https://www.mdpi.com/2073-4433/12/9/1130)
Supplement: s1 [file s1]

# Supplementary Material

Table S1. Meteorological parameters during sampling.

| Road type             | Temperature(C) | Relative humidity (%) | Wind speed/(m/s) | Predominant wind direction | Static wind rate/% |
|-----------------------|----------------|-----------------------|------------------|----------------------------|--------------------|
| Secondary road (BD)   | 31.71          | 53.84                 | 0.22             | South-west wind            | 1.95               |
| Major road (FK)       | 26.34          | 57.54                 | 0.35             | Northeast wind             | 4.92               |
| Urban expressway (JY) | 27.74          | 71.71                 | 0.52             | South-west wind            | 0.09               |
| Waihuan Road (WH)     | 27.37          | 61.50                 | 0.11             | South wind                 | 2.04               |
